# Supplementary material for: Ambulatory arterial stiffness index among children and adolescents with chronic kidney disease a report from the Chronic Kidney Disease in Children Study
Source: Research Square preprint supplement (doi:10.21203/rs.3.rs-9349516/v1), 2026-04-23

**Supplemental Figure 1**. Distribution of measured AASI overall and by ambulatory blood pressure hypertensive status. Abnormal ambulatory blood pressure is defined as an abnormal ABPM reading, regardless of clinic blood pressure (654 participants contributing a total of 1283 person-visits).


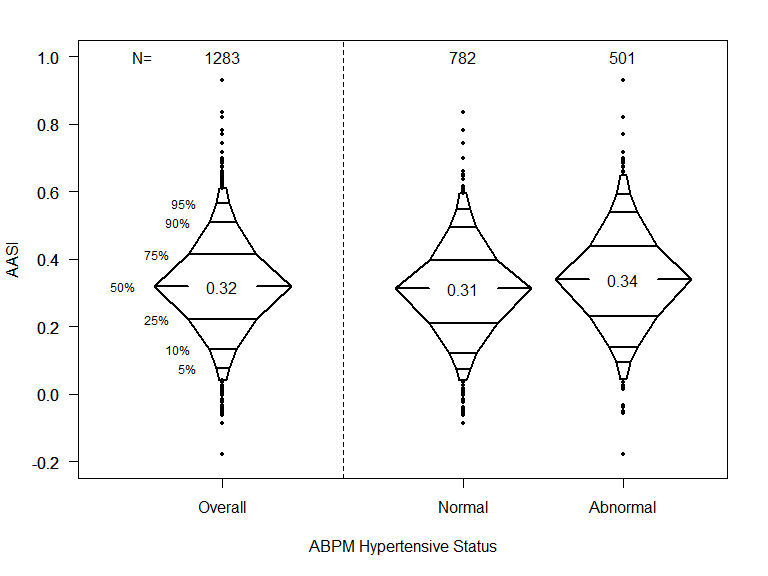

Supplement: Supplementary file 1 [file 6819b2821860f10171a88c37.docx]
