# Supplementary material for: Ambulatory arterial stiffness index among children and adolescents with chronic kidney disease a report from the Chronic Kidney Disease in Children Study
Source: Research Square preprint supplement (doi:10.21203/rs.3.rs-9349516/v1), 2026-04-23
Supplement: Supplementary file 3 [file 7473ed88ed8260c66795ddf8.docx]

**Supplemental Table 1**. Characteristics of the study population at first successful ABPM visit by hypertensive status, N=654. Median [interquartile range] or % (n).

|  | Normotensive, n=338 | White coat, n=40 | Masked,  n=179 | Ambulatory, n=97 |
| --- | --- | --- | --- | --- |
| Male sex | 58% (196) | 48% (19) | 67% (120) | 65% (63) |
| Age, years | 12.4 [9.2, 15.3] | 9.6 [7.1, 13.0] | 14.2 [10.2, 16.5] | 11.8 [9.1, 16.5] |
| CKD duration, years | 9.6 [5.9, 13.3] | 8.2 [5.9, 11.4] | 11.1 [7.1, 14.9] | 9.4 [6.3, 13.7] |
| Black race | 15% (52) | 10% (4) | 22% (40) | 26% (25) |
| Age-sex-specific height z-score | -0.5 [-1.2, 0.3] | -0.8 [-1.3, 0.0] | -0.3 [-1.1, 0.5] | -0.5 [-1.2, 0.0] |
| BMI |  |  |  |  |
| Underweight (<5th percentile) | 4% (13) | 5% (2) | 6% (10) | 0% (0) |
| Normal (5th to <85th percentile) | 66% (223) | 70% (28) | 69% (123) | 76% (74) |
| Overweight (85th to <95th percentile) | 14% (47) | 7% (3) | 15% (26) | 6% (6) |
| Obese (≥95th percentile) | 16% (55) | 18% (7) | 11% (20) | 18% (17) |
| Glomerular CKD | 28% (93) | 15% (6) | 24% (42) | 28% (27) |
| Urine protein/creatinine > 2 (mg/mg) | 6% (19) | 13% (5) | 9% (16) | 26% (25) |
| eGFR (ml/min per 1.73m2) | 49.5 [35.8, 64.0] | 47.6 [35.5, 60.4] | 51.6 [38.9, 64.9] | 42.7 [27.2, 62.5] |
| CKD stage |  |  |  |  |
| 1 (eGFR ≥90) | 5% (17) | 2% (1) | 3% (6) | 6% (6) |
| 2 (60 ≤ eGFR <90) | 28% (93) | 25% (10) | 30% (54) | 22% (21) |
| 3 (30 ≤ eGFR <60) | 52% (178) | 60% (24) | 50% (90) | 40% (39) |
| 4 (15 ≤ eGFR <30) | 15% (50) | 13% (5) | 15.% (27) | 28% (27) |
| 5 (eGFR <15) | 0% (0) | 0% (0) | 1% (2) | 4% (4) |
| Calcium‡ |  |  |  |  |
| Low | 15% (52) | 13% (5) | 15% (26) | 23% (22) |
| Normal | 82% (276) | 85% (34) | 84% (151) | 74% (72) |
| High | 3% (10) | 2% (1) | 1% (2) | 3% (3) |
| Phosphate‡ |  |  |  |  |
| Low | 3% (11) | 5% (2) | 1% (2) | 6% (6) |
| Normal | 81% (274) | 87% (35) | 79% (142) | 72% (70) |
| High | 16% (53) | 8% (3) | 20% (35) | 22% (21) |
| Currently taking ACEi/ARB | 66% (220) | 50% (20) | 53% (94) | 37% (36) |

‡ Based on age-specific threshold (ref 27)
